# Supplementary material for: DoEstRare: A statistical test to identify local enrichments in rare genomic variants associated with disease
Source: PubMed Central journal article supplement (PMC5524342; doi:10.1371/journal.pone.0179364), 2017-07-24
Supplement: pone.0179364.s001.pdf [file pone.0179364.s001.pdf]

## S1 TABLE: POWER AND TYPE I ERROR TABLES

Table A. Type I error results at nominal level  $\alpha=5\%$  based on 10,000 replicates.

|                  | Type I error |
|------------------|--------------|
| <b>CAST</b>      | 0.0399       |
| <b>WSS</b>       | 0.0472       |
| <b>VT</b>        | 0.0455       |
| <b>aSum</b>      | 0.0461       |
| <b>C-alpha</b>   | 0.0412       |
| <b>SKAT</b>      | 0.0398       |
| <b>SKAT-O</b>    | 0.0428       |
| <b>KBAC</b>      | 0.0467       |
| <b>ADA</b>       | 0.0455       |
| <b>DBM</b>       | 0.0436       |
| <b>CLUSTER</b>   | 0.048        |
| <b>KERNEL</b>    | 0.0433       |
| <b>PODKAT</b>    | 0.0426       |
| <b>BOMP</b>      | 0.0504       |
| <b>DoEstRare</b> | 0.0452       |

**Table B. Power results for the scenario 1 at nominal level  $\alpha=5\%$  based on 1000 replicates.**

|                  | <b>P5</b> | <b>P10</b> | <b>P15</b> | <b>P20</b> |
|------------------|-----------|------------|------------|------------|
| <b>CAST</b>      | 0.176     | 0.395      | 0.612      | 0.794      |
| <b>WSS</b>       | 0.262     | 0.511      | 0.726      | 0.881      |
| <b>VT</b>        | 0.245     | 0.462      | 0.642      | 0.802      |
| <b>aSum</b>      | 0.258     | 0.524      | 0.699      | 0.835      |
| <b>C-alpha</b>   | 0.36      | 0.636      | 0.791      | 0.888      |
| <b>SKAT</b>      | 0.35      | 0.632      | 0.798      | 0.892      |
| <b>SKAT-O</b>    | 0.328     | 0.625      | 0.793      | 0.895      |
| <b>KBAC</b>      | 0.328     | 0.62       | 0.822      | 0.941      |
| <b>ADA</b>       | 0.189     | 0.391      | 0.607      | 0.763      |
| <b>DBM</b>       | 0.165     | 0.352      | 0.546      | 0.726      |
| <b>CLUSTER</b>   | 0.177     | 0.363      | 0.583      | 0.728      |
| <b>KERNEL</b>    | 0.286     | 0.526      | 0.682      | 0.761      |
| <b>PODKAT</b>    | 0.25      | 0.508      | 0.663      | 0.8        |
| <b>BOMP</b>      | 0.321     | 0.62       | 0.795      | 0.914      |
| <b>DoEstRare</b> | 0.369     | 0.657      | 0.828      | 0.92       |

P5, P10, P15 and P20 correspond to 5%, 10%, 15% and 20% of DRVs in the gene. DRVs: disease-risk variants.

**Table C. Power results for the scenario 2 at nominal level  $\alpha=5\%$  based on 1000 replicates.**

|                  | <b>P5</b> | <b>P10</b> | <b>P15</b> | <b>P20</b> |
|------------------|-----------|------------|------------|------------|
| <b>CAST</b>      | 0.166     | 0.408      | 0.638      | 0.796      |
| <b>WSS</b>       | 0.259     | 0.537      | 0.748      | 0.868      |
| <b>VT</b>        | 0.224     | 0.451      | 0.668      | 0.791      |
| <b>aSum</b>      | 0.258     | 0.521      | 0.726      | 0.836      |
| <b>C-alpha</b>   | 0.348     | 0.639      | 0.792      | 0.89       |
| <b>SKAT</b>      | 0.335     | 0.633      | 0.797      | 0.887      |
| <b>SKAT-O</b>    | 0.317     | 0.612      | 0.799      | 0.904      |
| <b>KBAC</b>      | 0.33      | 0.64       | 0.83       | 0.927      |
| <b>ADA</b>       | 0.167     | 0.375      | 0.592      | 0.739      |
| <b>DBM</b>       | 0.155     | 0.353      | 0.57       | 0.715      |
| <b>CLUSTER</b>   | 0.181     | 0.413      | 0.635      | 0.783      |
| <b>KERNEL</b>    | 0.313     | 0.592      | 0.768      | 0.868      |
| <b>PODKAT</b>    | 0.267     | 0.626      | 0.831      | 0.931      |
| <b>BOMP</b>      | 0.333     | 0.619      | 0.798      | 0.912      |
| <b>DoEstRare</b> | 0.378     | 0.707      | 0.865      | 0.944      |

P5, P10, P15 and P20 correspond to 5%, 10%, 15% and 20% of DRVs in the gene. DRVs: disease-risk variants.

**Table D. Power results for the scenario 3 at nominal level  $\alpha=5\%$  based on 1000 replicates.**

|                  | <b>P5</b> | <b>P10</b> | <b>P15</b> | <b>P20</b> |
|------------------|-----------|------------|------------|------------|
| <b>CAST</b>      | 0.154     | 0.399      | 0.619      | 0.791      |
| <b>WSS</b>       | 0.237     | 0.514      | 0.729      | 0.876      |
| <b>VT</b>        | 0.207     | 0.466      | 0.655      | 0.814      |
| <b>aSum</b>      | 0.26      | 0.509      | 0.709      | 0.835      |
| <b>C-alpha</b>   | 0.361     | 0.623      | 0.78       | 0.876      |
| <b>SKAT</b>      | 0.352     | 0.623      | 0.782      | 0.881      |
| <b>SKAT-O</b>    | 0.339     | 0.601      | 0.775      | 0.89       |
| <b>KBAC</b>      | 0.324     | 0.65       | 0.823      | 0.931      |
| <b>ADA</b>       | 0.196     | 0.394      | 0.593      | 0.736      |
| <b>DBM</b>       | 0.192     | 0.394      | 0.569      | 0.743      |
| <b>CLUSTER</b>   | 0.195     | 0.393      | 0.606      | 0.782      |
| <b>KERNEL</b>    | 0.317     | 0.566      | 0.714      | 0.83       |
| <b>PODKAT</b>    | 0.28      | 0.591      | 0.787      | 0.909      |
| <b>BOMP</b>      | 0.341     | 0.624      | 0.795      | 0.906      |
| <b>DoEstRare</b> | 0.387     | 0.689      | 0.841      | 0.933      |

P5, P10, P15 and P20 correspond to 5%, 10%, 15% and 20% of DRVs in the gene. DRVs: disease-risk variants.
