# Supplementary material for: DoEstRare: A statistical test to identify local enrichments in rare genomic variants associated with disease
Source: PubMed Central journal article supplement (PMC5524342; doi:10.1371/journal.pone.0179364), 2017-07-24
Supplement: pone.0179364.s002.pdf [file pone.0179364.s002.pdf]

# S1 FIG: POWER COMPARISON BETWEEN SIMULATED SCENARIOS

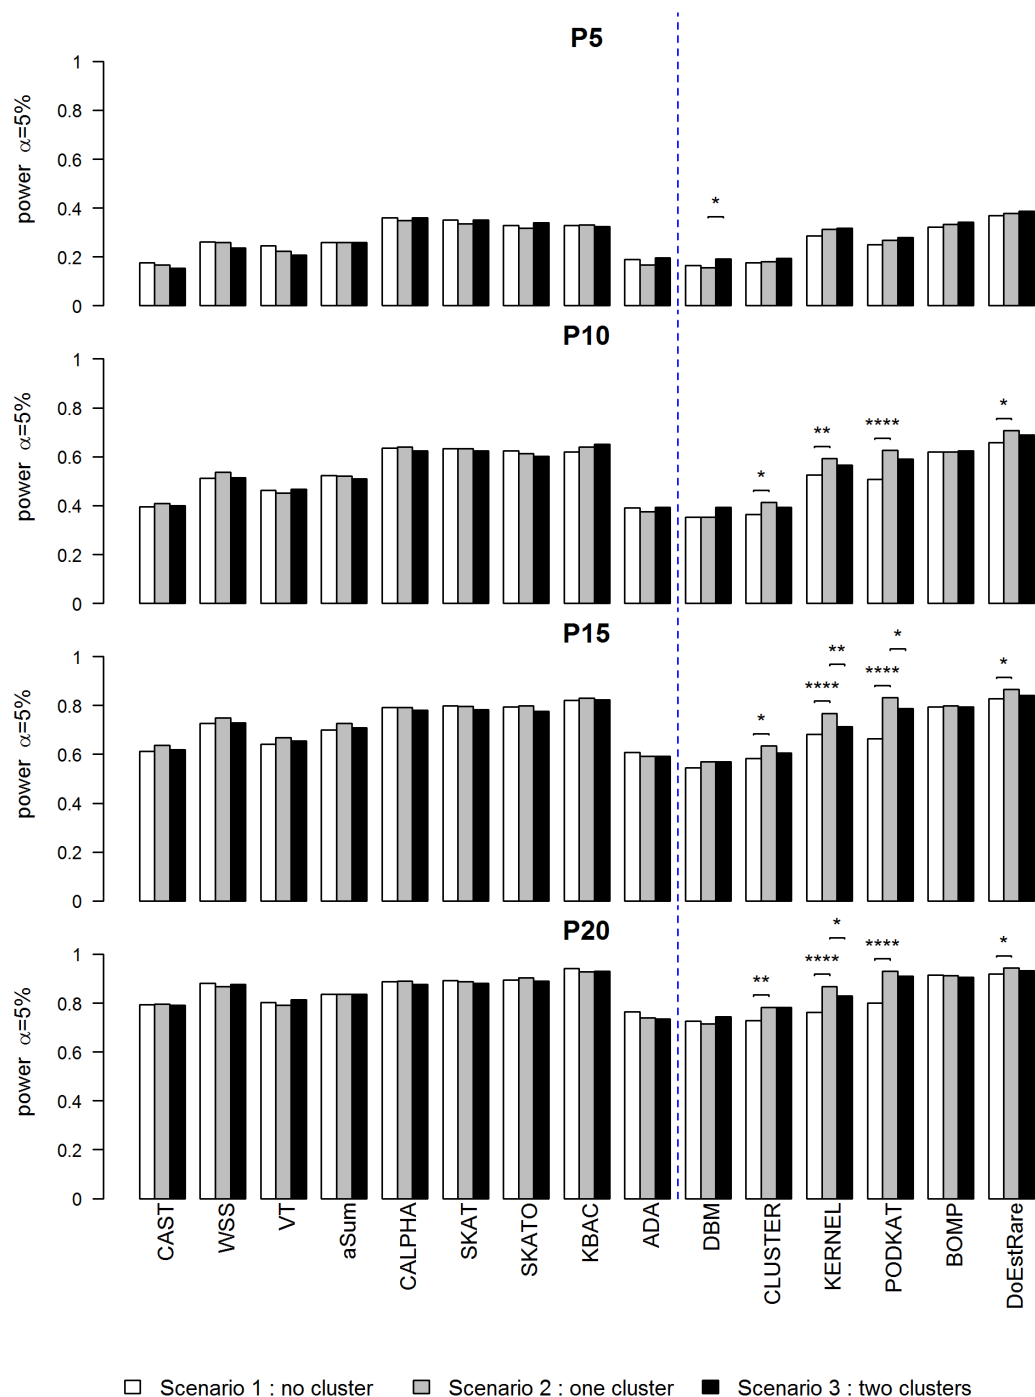

**Fig A. Power comparison between scenarios.** A Fisher exact test has been performed to test the independency between the gene significance at level  $\alpha=5\%$  and the compared scenarios [see S1 Text, p15]. We compared scenarios 1 and 2 (resp. 2 and 3). ns:  $p>0.05$ , \*:  $p\leq 0.05$ , \*\*:  $p\leq 0.01$ , \*\*\*:  $p\leq 0.001$ , \*\*\*\*:  $p\leq 0.0001$ . The dashed blue line separates “position tests” (DBM, CLUSTER, KERNEL, PODKAT, BOMP and DoEstRare) from other tests.
