# Supplementary material for: DoEstRare: A statistical test to identify local enrichments in rare genomic variants associated with disease
Source: PubMed Central journal article supplement (PMC5524342; doi:10.1371/journal.pone.0179364), 2017-07-24
Supplement: pone.0179364.s003.pdf [file pone.0179364.s003.pdf]

## S2 FIG: MANHATTAN PLOTS FOR EOAD RESULTS

From Fig A to Fig I, are represented significance results for the 17,409 autosomal genes that were analyzed. Only the names of the three genes, *KRTAP5-5*, *CELA3B* and *NIPAL4*, are indicated. The red line corresponds to a significance level of  $2.5 \times 10^{-6}$  (5% adjusted with a Bonferroni correction for 20,000 genes).

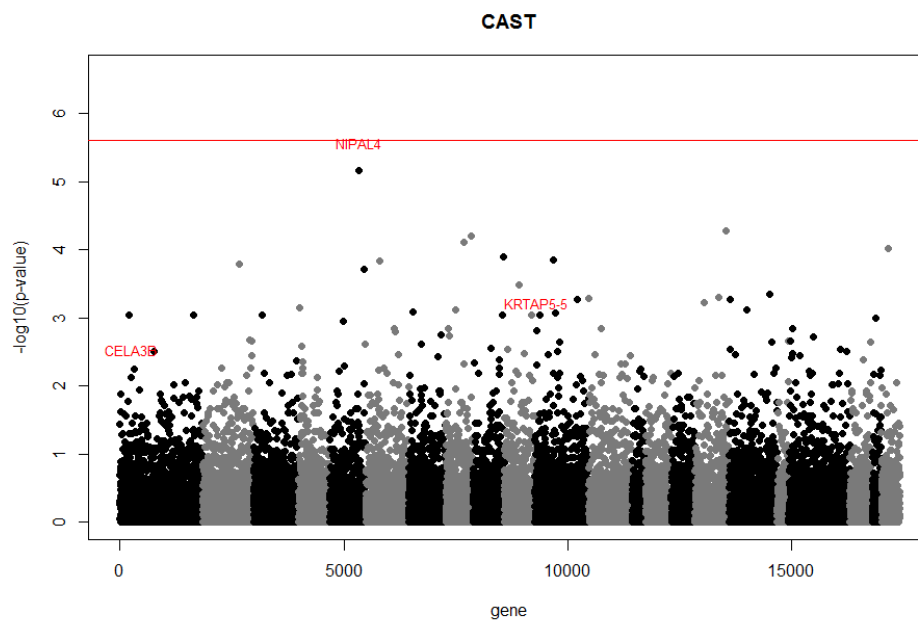

**Fig A. Manhattan plot for EOAD results with CAST.**

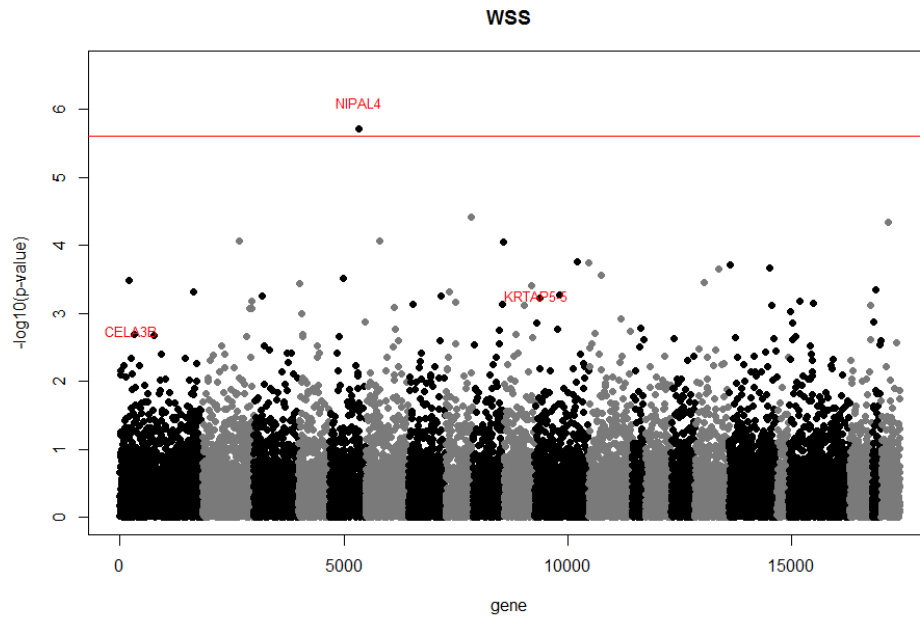

**Fig B. Manhattan plot for EOAD results with WSS.**

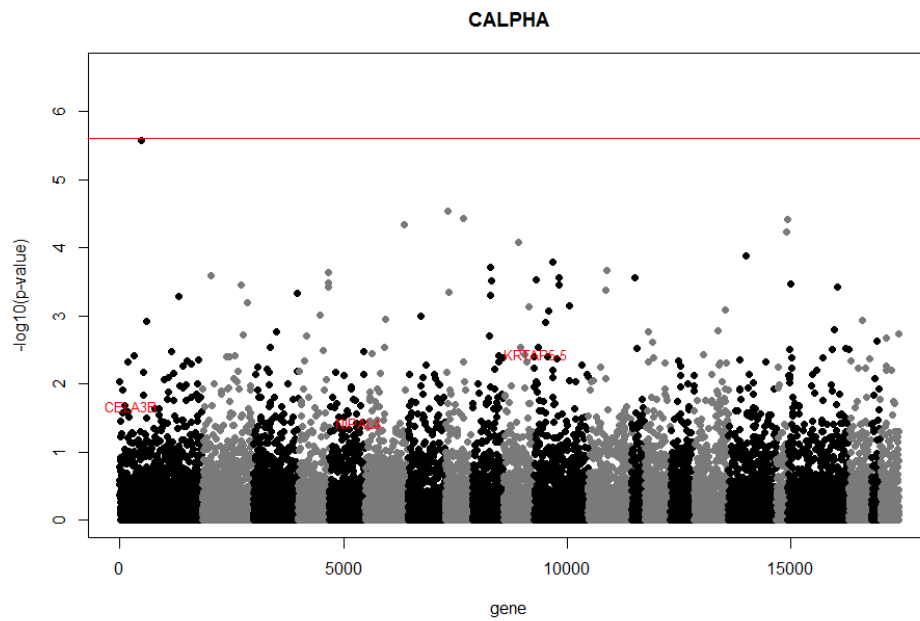

**Fig C. Manhattan plot for EOAD results with C-alpha.**

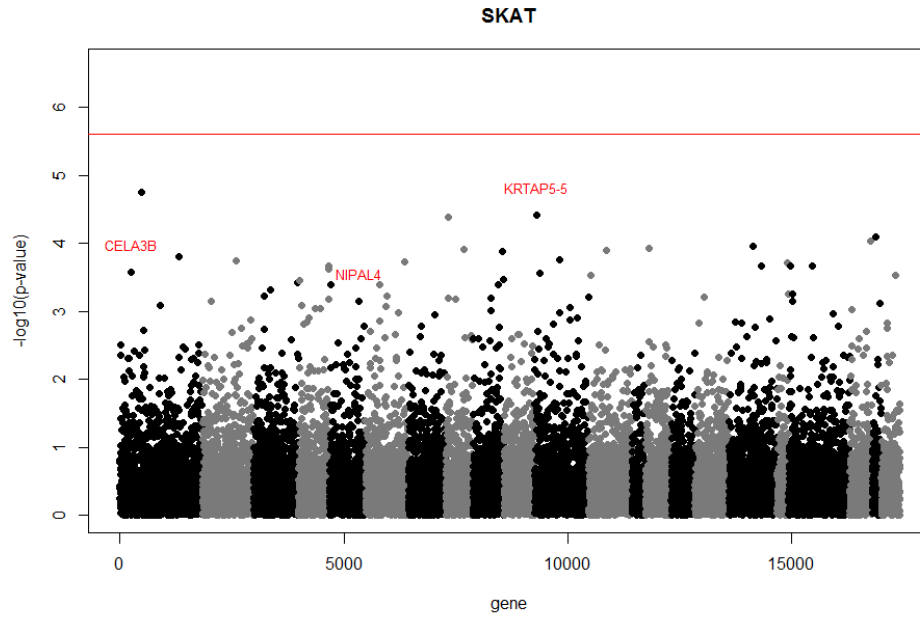

**Fig D. Manhattan plot for EOAD results with SKAT.**

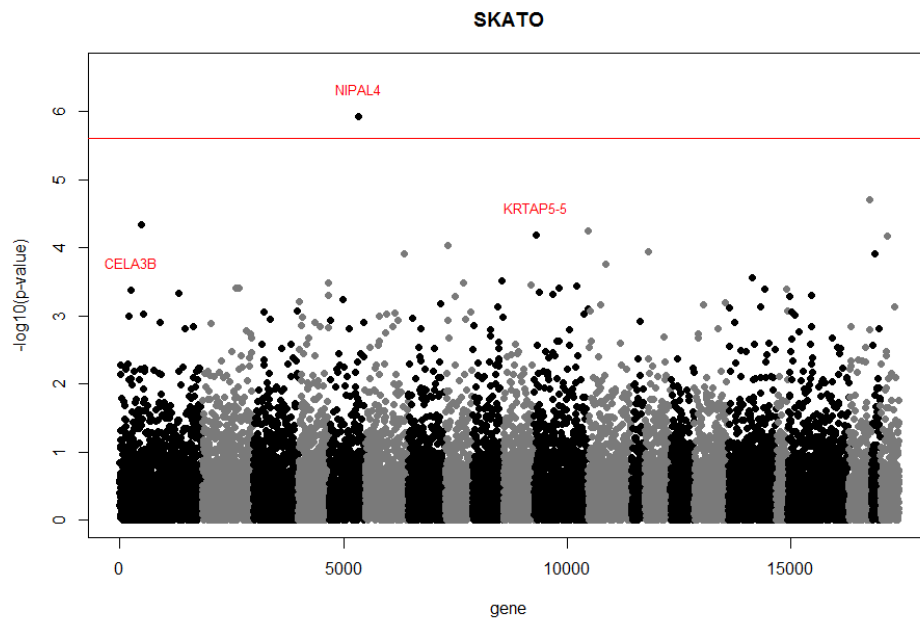

**Fig E. Manhattan plot for SKAT-O results with WSS.**

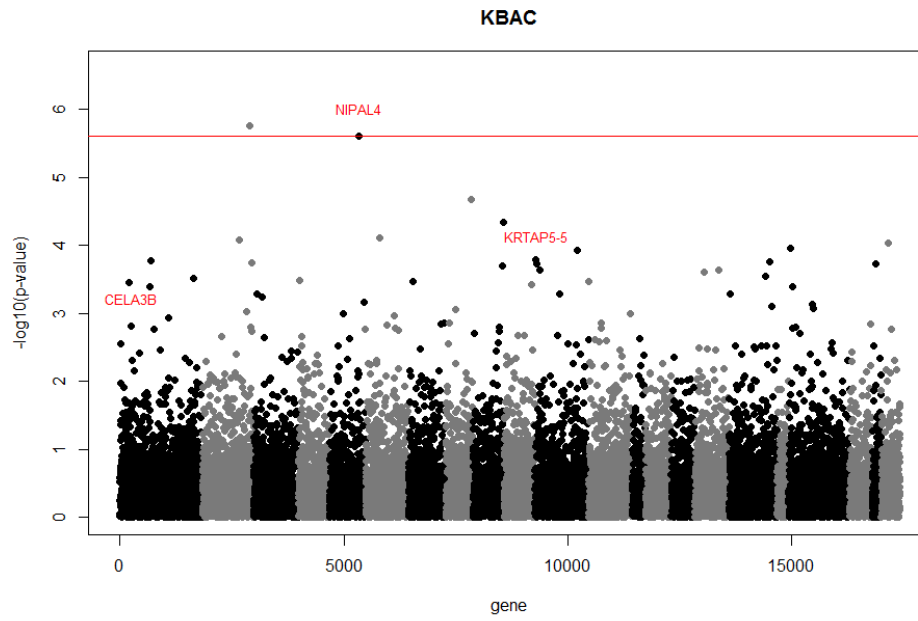

**Fig F. Manhattan plot for EOAD results with KBAC.**

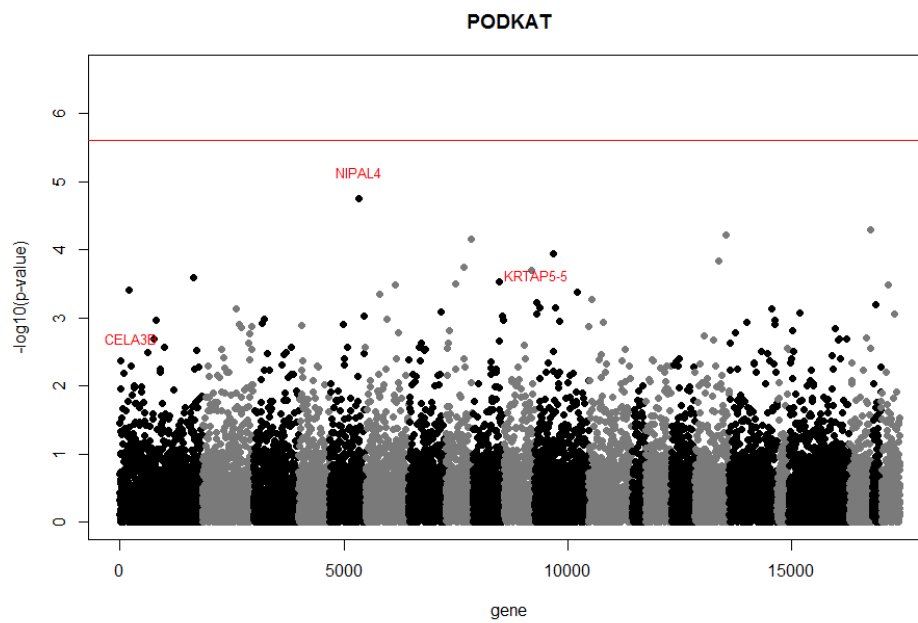

**Fig G. Manhattan plot for EOAD results with PODKAT.**

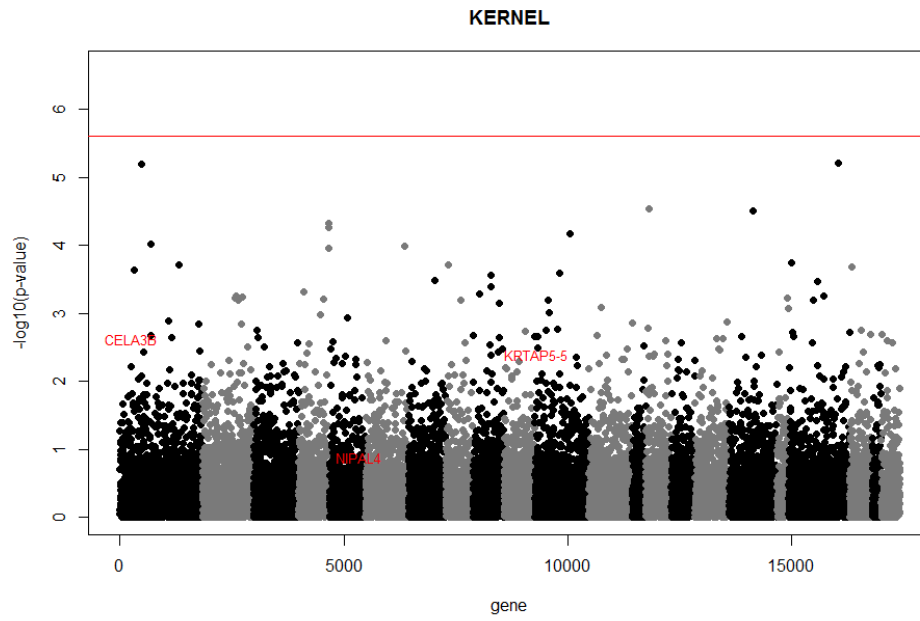

**Fig H. Manhattan plot for EOAD results with KERNEL.**

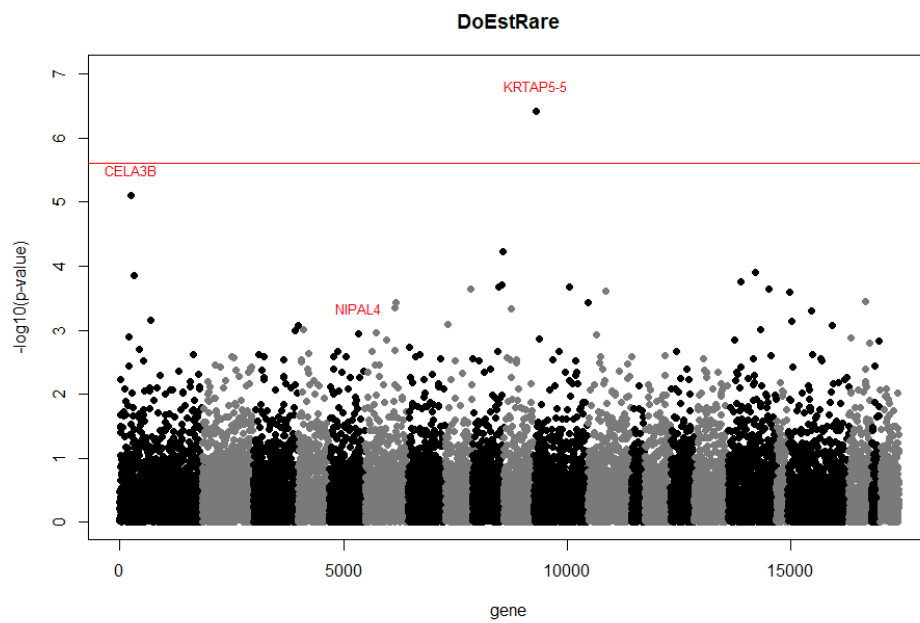

**Fig I. Manhattan plot for EOAD results with DoEstRare.**
