# Supplementary material for: DoEstRare: A statistical test to identify local enrichments in rare genomic variants associated with disease
Source: PubMed Central journal article supplement (PMC5524342; doi:10.1371/journal.pone.0179364), 2017-07-24
Supplement: pone.0179364.s004.pdf [file pone.0179364.s004.pdf]

### S3 FIG: MUTATION POSITION DENSITY PLOTS FOR EOAD RESULTS

From Fig A to Fig C, are represented allele counts and mutation position densities for the three genes, *KRTAP5-5*, *CELA3B* and *NIPAL4*, in cases and controls. Density functions for mutation positions were estimated with a Gaussian kernel.

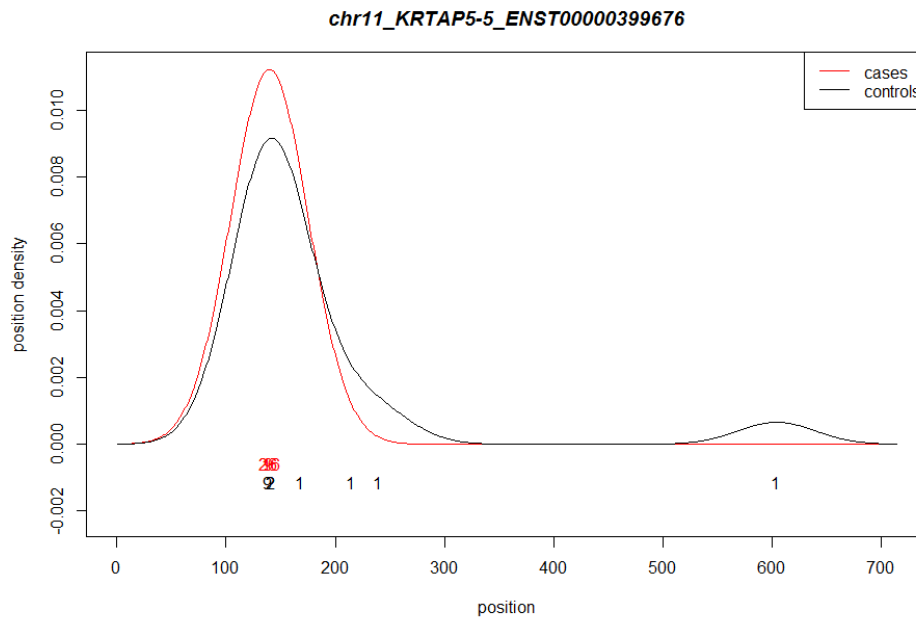

**Fig A. Mutation position density for the *KRTAP5-5* gene (8 rare variants).**

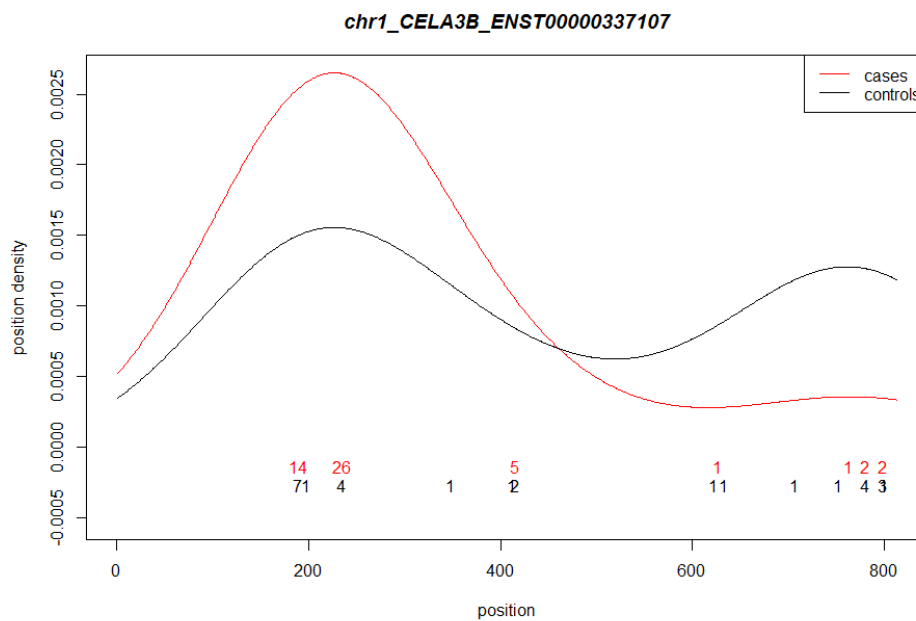

**Fig B. Mutation position density for the *CELA3B* gene (15 rare variants).**

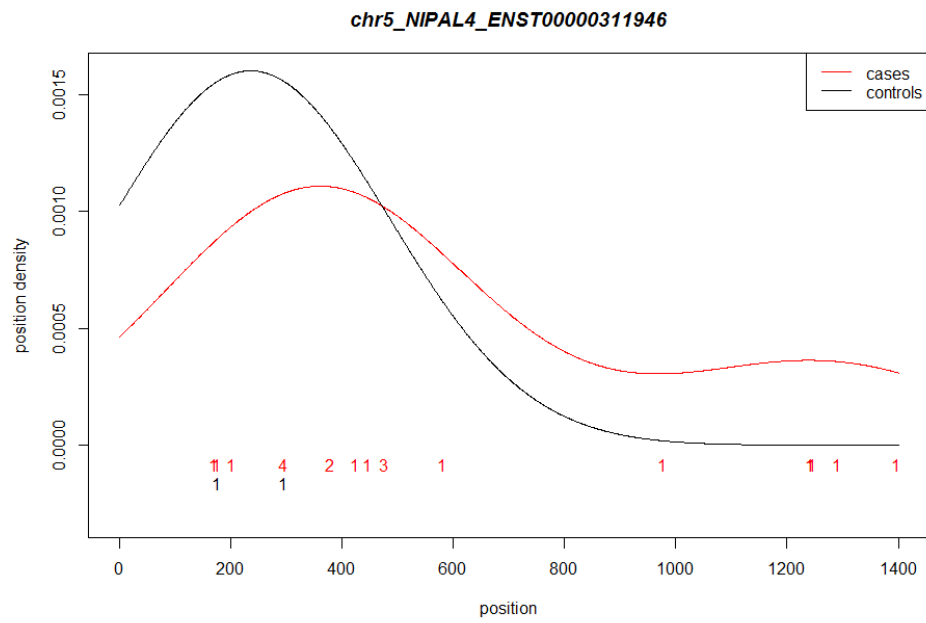

**Fig C. Mutation position density for the *NIPAL4* gene (15 rare variants).**
